# Supplementary material for: Adsorption of metal adatoms on single-layer phosphorene
Source: Royal Society of Chemistry journal article supplement (doi:10.1039/c4cp03890h), 2014-11-19
Supplement: c4cp03890h1.pdf [file c4cp03890h1.pdf]

## Electronic Supplementary Information

# Adsorption of Metal Adatoms on Single-Layer Phosphorene

*Vadym V. Kulish,<sup>1,2\*</sup> Oleksandr I. Malyi,<sup>3</sup> Clas Persson,<sup>3,4</sup> Ping Wu<sup>1\*</sup>*

<sup>1</sup>Entropic Interface Group, Singapore University of Technology and Design, 20 Dover Drive,  
Singapore 138682, Singapore

<sup>2</sup>Institute of High Performance Computing, 1 Fusionopolis Way, #16-16 Connexis, Singapore 138632,  
Singapore

<sup>3</sup>Department of Physics, University of Oslo, P.O. Box 1048 Blindern, NO-0316 Oslo, Norway

<sup>4</sup>Department of Materials Science and Engineering, Royal Institute of Technology, SE-100 44  
Stockholm, Sweden

E-mail: vadym\_kulish@sutd.edu.sg (V.V.K.), wuping@sutd.edu.sg (P.W.)

S1. Computational details.

S2. Calculated structural properties of the relevant bulk phases (pseudopotential testing).

S3. Adsorption of adatoms on monolayer and bilayer phosphorene

S4. Spin density distribution in TM-phosphorene

S5. Additional density of states (DOS) figures.

## ***S1. Computational Details***

We use an orthorhombic supercell ( $\alpha = \beta = \gamma = 90^\circ$ ) with periodic boundary conditions to model adatom-phosphorene structure. Vacuum spacing of 20 Å is used to create isolated single-layer conditions. The typical simulation cell is shown in Figure S1.

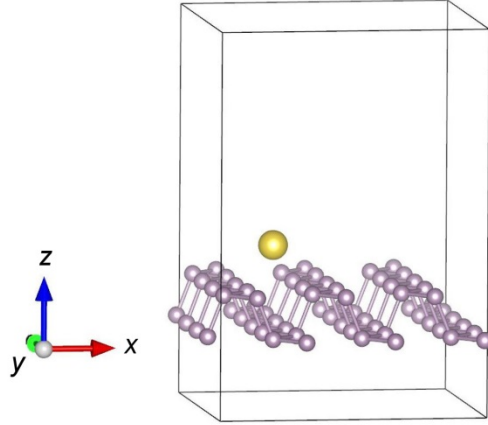

**Figure S1.** Typical (3×4) simulation supercell containing single-layer phosphorene and adatom.

## ***S2. Calculated structural properties of the relevant bulk phases.***

The accuracy of used pseudopotentials has been tested by calculating the lattice constants and cohesive energies for bulk structures of the studied elements. To determine the optimal lattice constant, the total energy of the given structure is calculated as a factor of the unit cell size. The lattice constant is then defined as a unit cell size, for which the total energy is minimal. The cohesive energy is defined as

$$E_{coh} = \frac{E_{bulk}}{N_{atoms}} - E_{atom}$$

where  $E_{bulk}$  and  $E_{atom}$  are total energies of bulk crystal and free atom, respectively.  $N_{atoms}$  is the number of atoms in the bulk crystal.

The obtained results are summarized and compared to the experimental data in Table S1. The best agreement between theory and experiment is achieved for *s*- and *p*-valence systems, such as Si, Ge, alkali metals. The description of transition metals with many *d* electrons is more complicated (this is well expected). Nevertheless, we have achieved a good level of consistency with the experimental

values and available modeling results at the same level of theory. The results of these benchmark calculations support our choice of pseudopotentials.

**Table S1.** Calculated structural parameters for the bulk phases of studied elements

| Element | Crystal structure | Lattice constant (this work) | Lattice constant (exp) <sup>1</sup> | Cohesive energy (this work) | Cohesive energy (exp) <sup>1</sup> | Cohesive energy (theory) <sup>2</sup> LDA (PW) |
|---------|-------------------|------------------------------|-------------------------------------|-----------------------------|------------------------------------|------------------------------------------------|
| Li      | <i>bcc</i>        | 3.54                         | 3.49                                | 1.54                        | 1.63                               |                                                |
| Na      | <i>bcc</i>        | 4.20                         | 4.22                                | 1.05                        | 1.113                              |                                                |
| K       | <i>bcc</i>        | 5.28                         | 5.22                                | 0.83                        | 0.934                              |                                                |
|         |                   |                              |                                     |                             |                                    |                                                |
| Cu      | <i>fcc</i>        | 3.67                         | 3.61                                | 3.28                        | 3.49                               |                                                |
| Ag      | <i>fcc</i>        | 4.16                         | 4.09                                | 2.53                        | 2.95                               |                                                |
| Au      | <i>fcc</i>        | 4.17                         | 4.08                                | 3.01                        | 3.81                               |                                                |
| Pd      | <i>fcc</i>        | 3.95                         | 3.89                                | 3.71                        | 3.89                               |                                                |
| Pt      | <i>fcc</i>        | 3.99                         | 3.92                                | 5.43                        | 5.84                               |                                                |
|         |                   |                              |                                     |                             |                                    |                                                |
| Ti      | <i>hcp</i>        | a = 2.95<br>c = 4.61         | a = 2.95<br>c = 4.68                | 5.23                        | 4.85                               | 6.29 (5.09)                                    |
| V       | <i>bcc</i>        | 3.00                         | 3.03                                | 5.17                        | 5.31                               | 6.49 (5.12)                                    |
| Cr      | <i>bcc</i>        | 2.87                         | 2.88                                | 3.97                        | 4.10                               | 5.22 (3.80)                                    |
| Mn      | <i>bcc</i>        | 2.82                         | 3.08 (Ref <sup>3</sup> )            | 3.70                        | 2.92                               | 5.19 (3.73)                                    |
| Fe      | <i>bcc</i>        | 2.83                         | 2.87                                | 4.95                        | 4.28                               | 6.25 (4.78)                                    |
| Co      | <i>hcp</i>        | a = 2.50<br>c = 4.02         | a = 2.51<br>c = 4.07                | 5.08                        | 4.39                               | 6.51 (4.88)                                    |
| Ni      | <i>fcc</i>        | 3.52                         | 3.52                                | 4.82                        | 4.44                               | 5.98 (4.52)                                    |
|         |                   |                              |                                     |                             |                                    |                                                |
| Si      | <i>diamond</i>    | 5.47                         | 5.43                                | 4.60                        | 4.63                               |                                                |
| Ge      | <i>diamond</i>    | 5.76                         | 5.66                                | 3.74                        | 3.85                               |                                                |

### *S3. Adsorption of adatoms on monolayer and bilayer phosphorene*

We have performed a series of calculations on the adsorption of alkali adatoms on the monolayer and bilayer phosphorene. We have chosen Li, Na and K adatoms as examples due to their relevance to Li-ion and Na-ion batteries (note that P is a promising anode material). The obtained results are summarized in Table S2.

**Table S2.** Calculated adsorption energies for alkali adatoms on monolayer and bilayer phosphorene

| Adatom | $E_a@Bilayer$ (eV) | $E_a@Monolayer$ (eV) | dE (eV) |
|--------|--------------------|----------------------|---------|
| Li     | -1.91              | -1.88                | -0.03   |
| Na     | -1.35              | -1.31                | -0.04   |
| K      | -1.67              | -1.61                | -0.06   |

We find that the adsorption energy is slightly larger on bilayer than monolayer phosphorene. This result is consistent with the recent experimental studies. Using cyclic voltammetry and in situ Raman spectroscopy, Pollak et al. demonstrated that the interaction of Li with few-layer graphene is stronger than with monolayer.<sup>4</sup> However, our calculated difference in adsorption energy is relatively small (-0.03...-0.06 eV, see Table S2). This is consistent with the theoretical study of Ling et al, which suggested that the Na adsorption voltage on  $BC_3$  is only little affected by the number of  $BC_3$  layers.<sup>5</sup>

### *S4. Spin density distribution in TM-phosphorene*

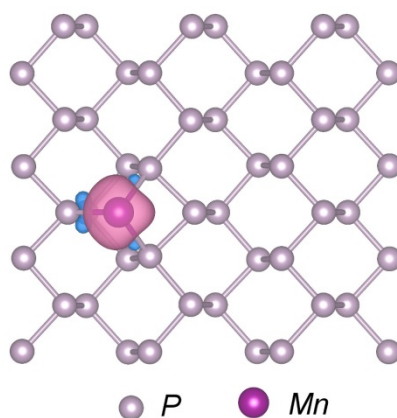

**Figure S2.** Isosurface of the total spin density for the Mn-phosphorene system. Pink isosurface color corresponds to positive values of the spin density, blue – to the negative values.

### S5. Additional density of states (DOS) figures

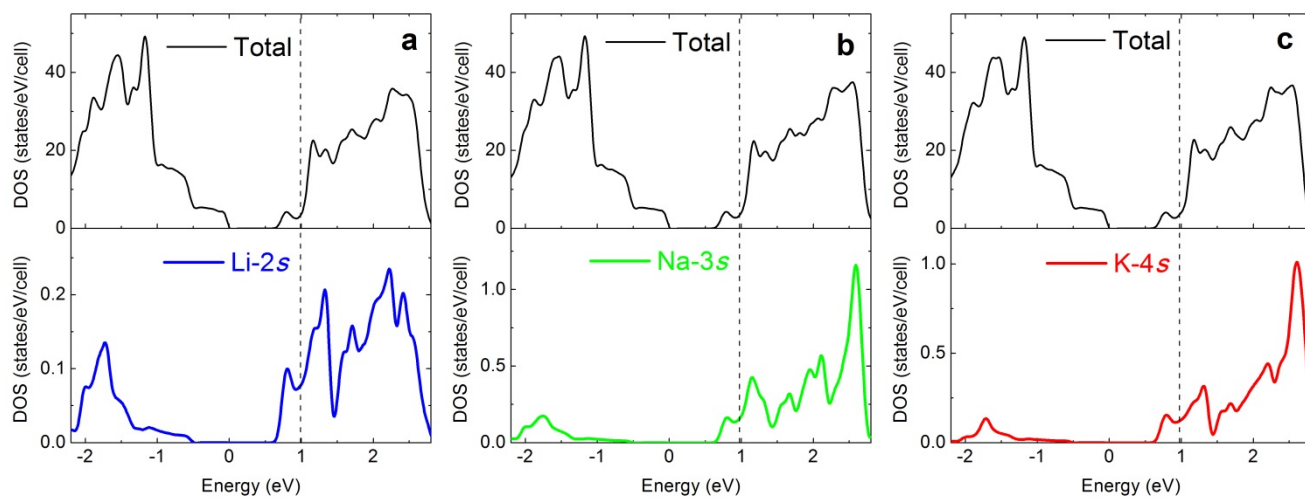

**Figure S3.** Total and projected DOS for alkali adatoms on single-layer phosphorene: (a) Li, (b) Na, and (c) K. The zero energy corresponds to the VBM. The dashed vertical line indicates the Fermi level.

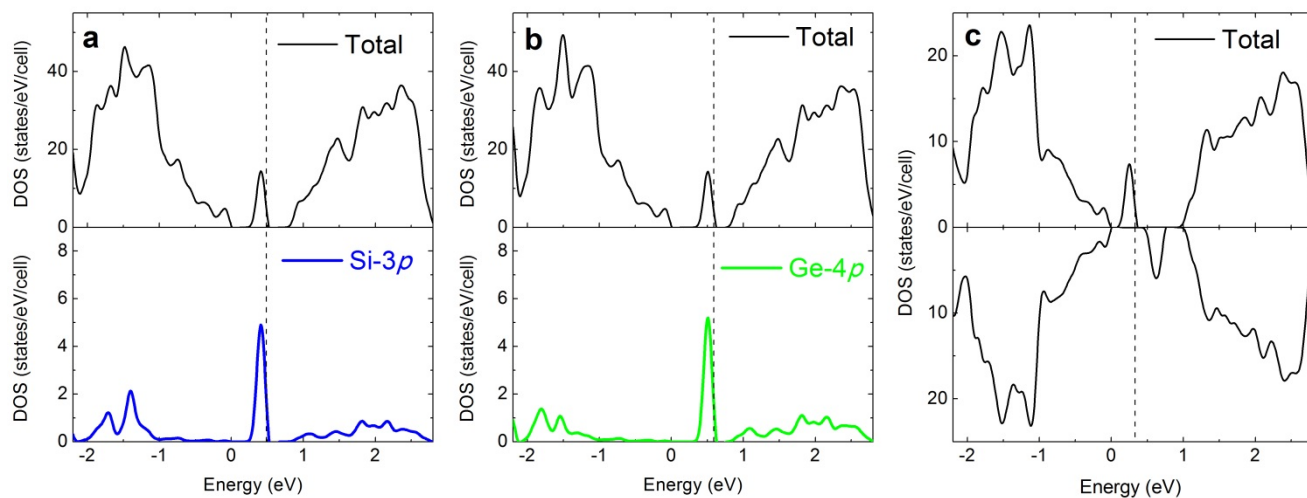

**Figure S4.** Total and projected DOS for semiconductor adatoms and hydrogen on single-layer phosphorene: (a) Si, (b) Ge, and (c) H. The zero energy corresponds to the VBM. The dashed vertical line indicates the Fermi level.

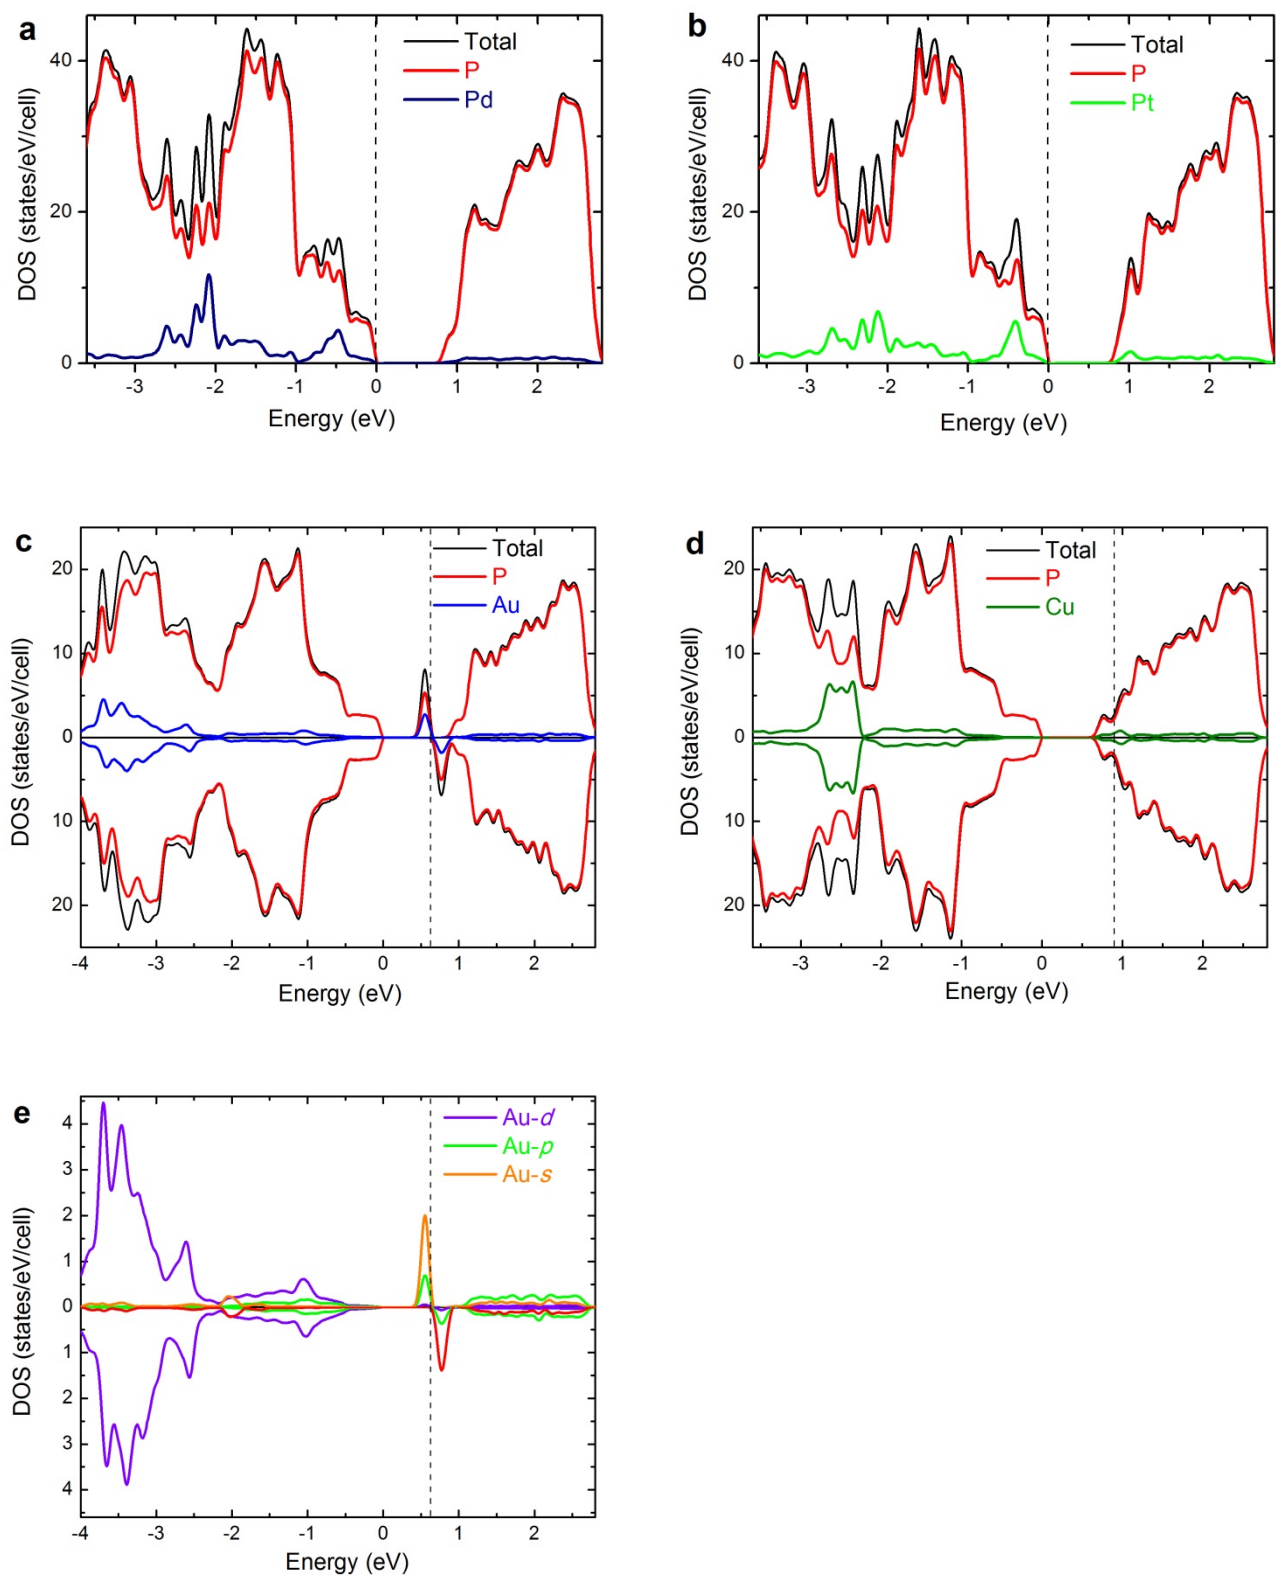

**Figure S5.** Total DOS for noble metal adatoms on single-layer phosphorene: (a) Pd, (b) Pt, (c) Au, and (d) Cu. (e) Projected DOS for Au adatom on phosphorene. The zero energy corresponds to the VBM.

The dashed vertical line indicates the Fermi level.

## References:

1. C. Kittel, *Introduction to Solid State Physics*, 8th edn., Wiley, 2004.
2. P. H. T. Philipsen and E. J. Baerends, *Phys. Rev. B*, 1996, **54**, 5326-5333.
3. R. W. G. Wyckoff, *Crystal structures*, Interscience Publishers, New York, 1963.
4. E. Pollak, B. S. Geng, K. J. Jeon, I. T. Lucas, T. J. Richardson, F. Wang and R. Kostecki, *Nano Lett.*, 2010, **10**, 3386-3388.
5. C. Ling and F. Mizuno, *Phys. Chem. Chem. Phys.*, 2014.
